# Supplementary material for: Gradient and multilevel surface modification of Ni-rich layered cathodes by gas penetration for enhanced electrochemical performance
Source: Royal Society of Chemistry journal article supplement (doi:10.1039/d3ta06881a), 2024-01-01
Supplement: d3ta06881a1.pdf [file d3ta06881a1.pdf]

**Supporting Information**

**Gradient and multilevel surface modification of Ni-rich  
layered cathodes by gas penetration for enhanced  
electrochemical performance**

**Rui Jiang\*, Zhongjia Dai, Yongen Gao, Xikang Zhao, Jianfang Du, Gang  
Li\*, Zexue Du**

Research Institute of Petroleum Processing, SINOPEC, Beijing 100083, China  
E-mail address: [jiangrui.ripp@sinopec.com](mailto:jiangrui.ripp@sinopec.com) (R. Jiang); [ligang.ripp@sinopec.com](mailto:ligang.ripp@sinopec.com)  
(G. Li)

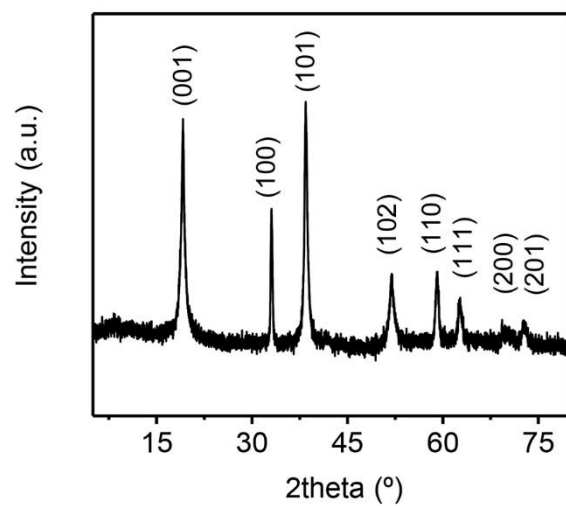

**Fig. S1.** XRD patterns of the NCM-OH precursor.

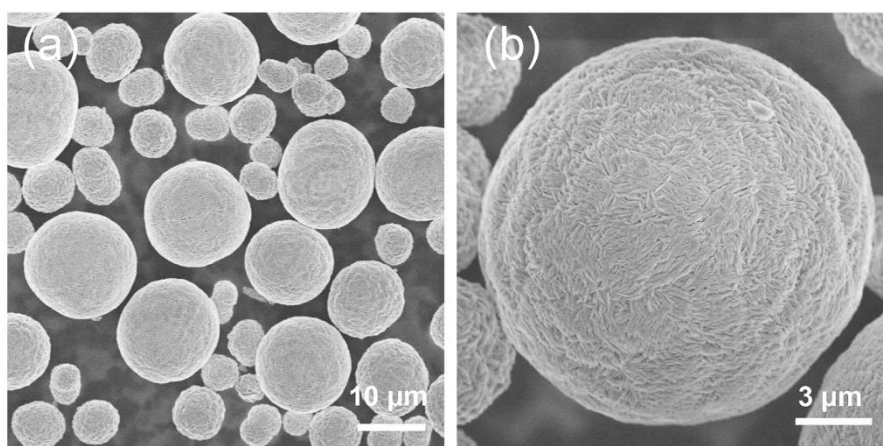

**Fig. S2.** SEM images of the NCM-OH precursor.

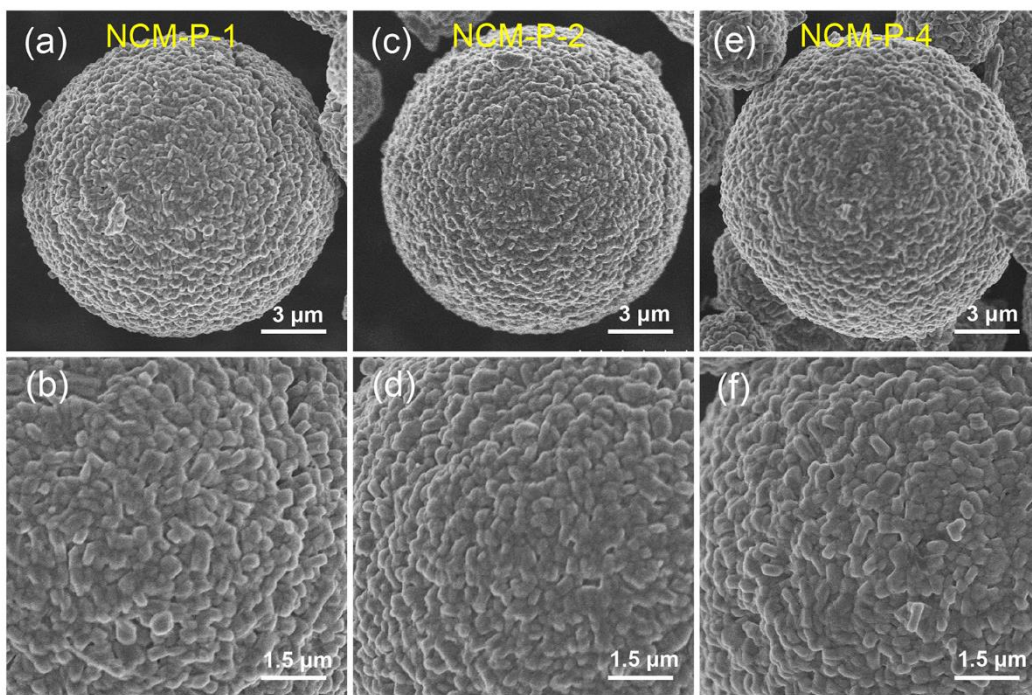

**Fig. S3.** SEM images of (a, b) NCM-P-1; (c, d) NCM-P-2; (e, f) NCM-P-4.

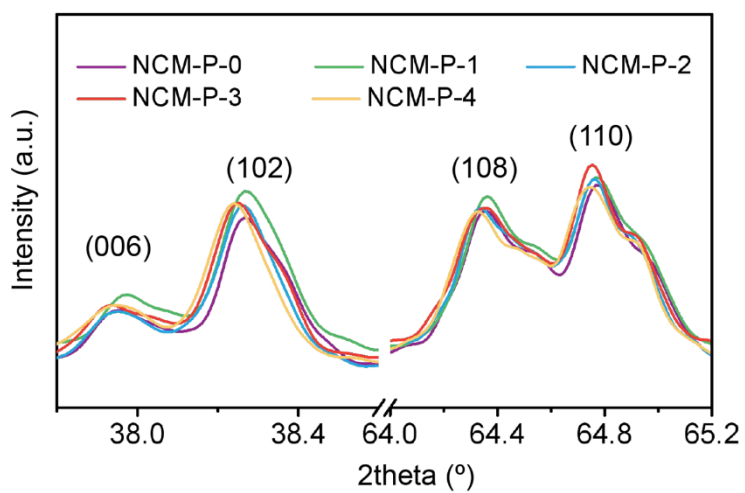

**Fig. S4.** The partial enlarged XRD patterns of NCM-P-x samples.

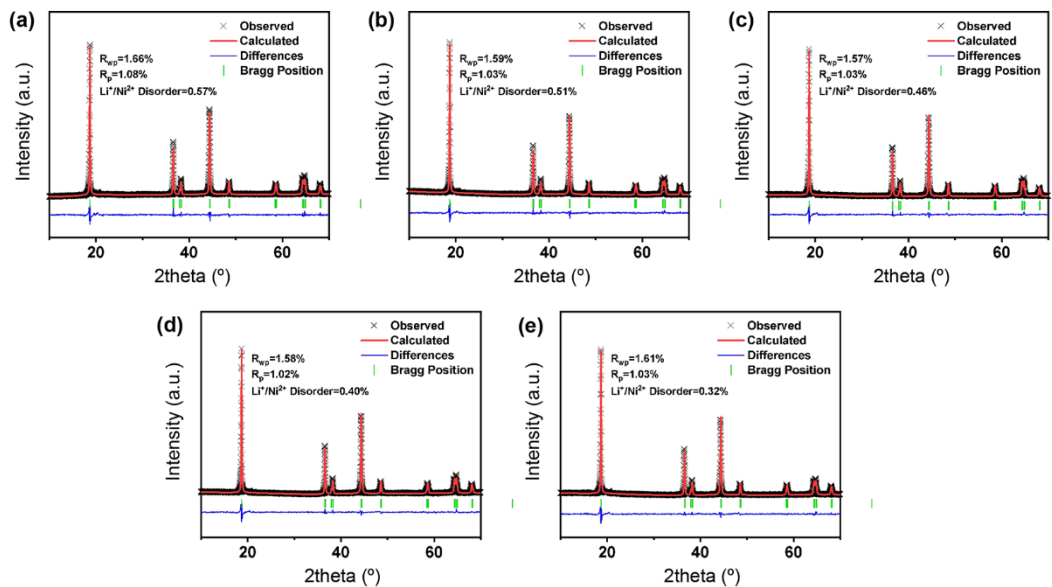

**Fig. S5.** The XRD refinement of the NCM-P-*x* samples. (a) NCM-P-0; (b) NCM-P-1; (c) NCM-P-2; (d) NCM-P-3; (e) NCM-P-4.

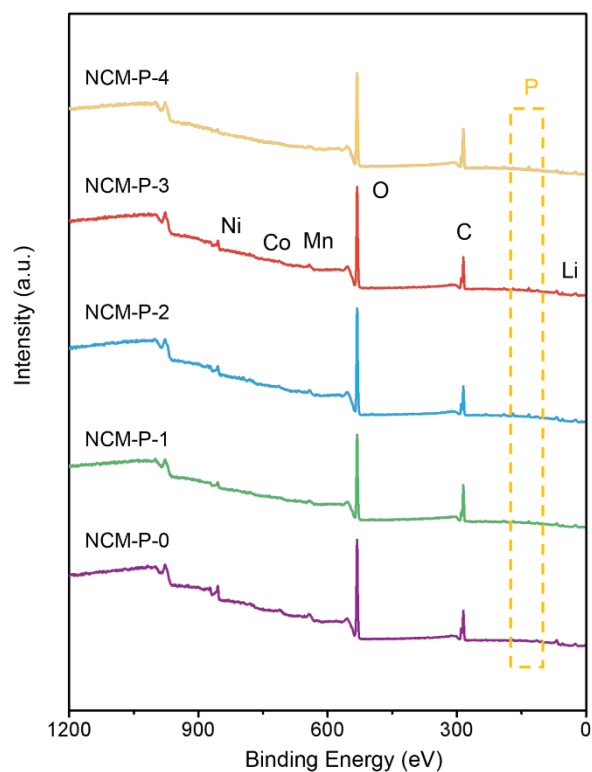

**Fig. S6.** XPS survey spectra of NCM-P-*x* samples.

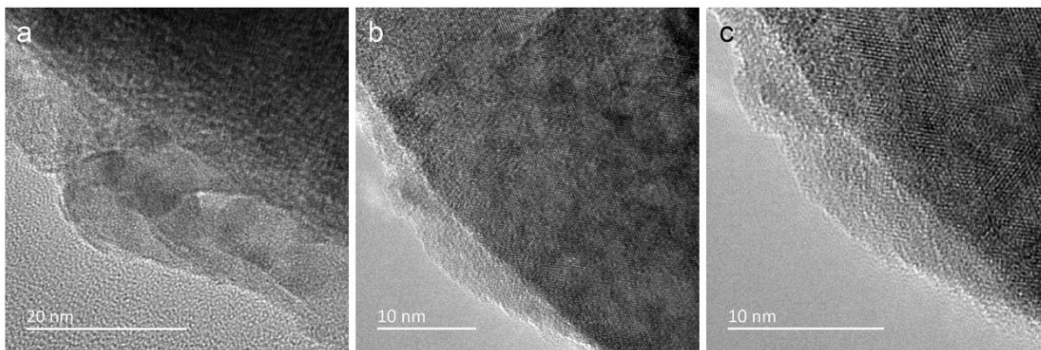

**Fig. S7.** HRTEM images of NCM-P-3 sample.

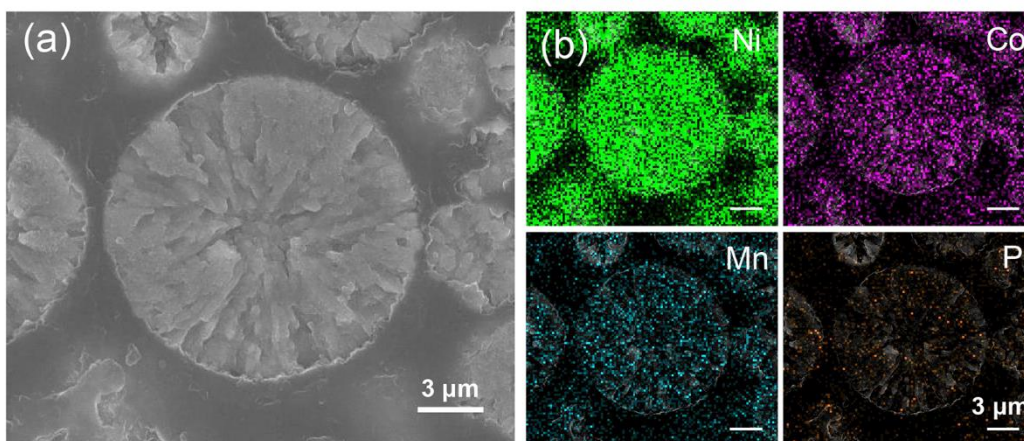

**Fig. S8.** (a) Cross-sectional SEM images and (b) corresponding element mappings of NCM-P-3.

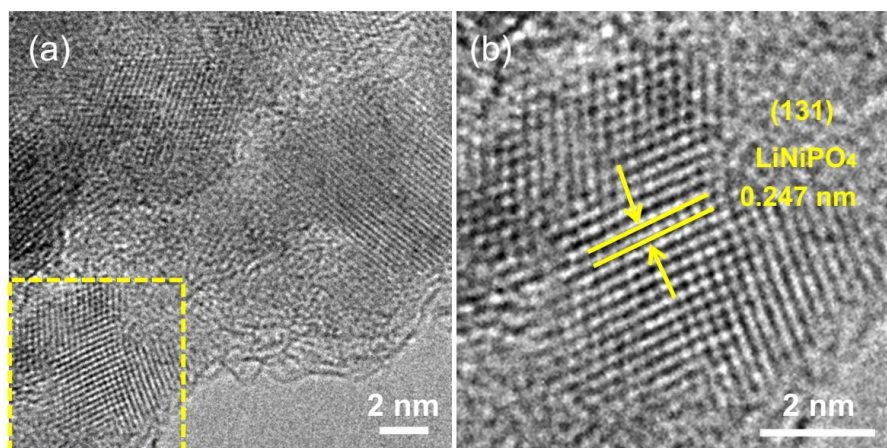

**Fig. S9.** HRTEM images of the manual pulverized NCM-P-3 sample.

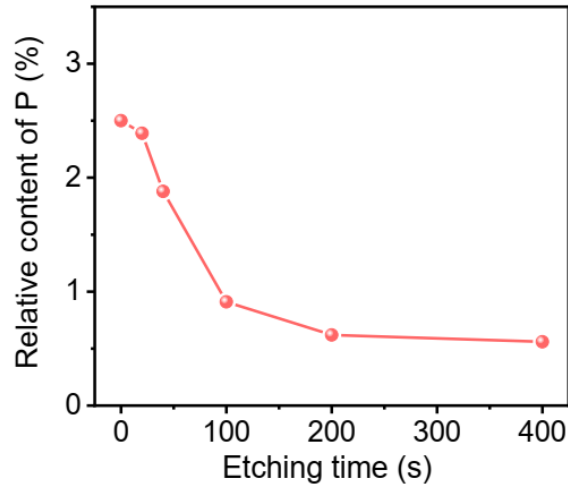

**Fig. S10.** The relative content of P as a function of etching time based on the XPS depth spectra results.

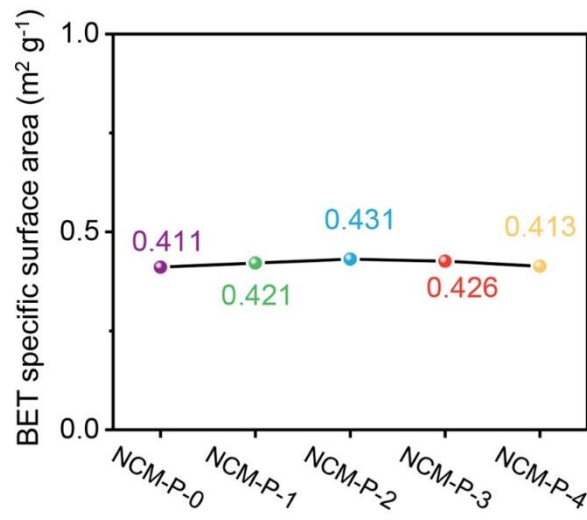

**Fig. S11.** The BET specific surface area of NCM-P-x samples.



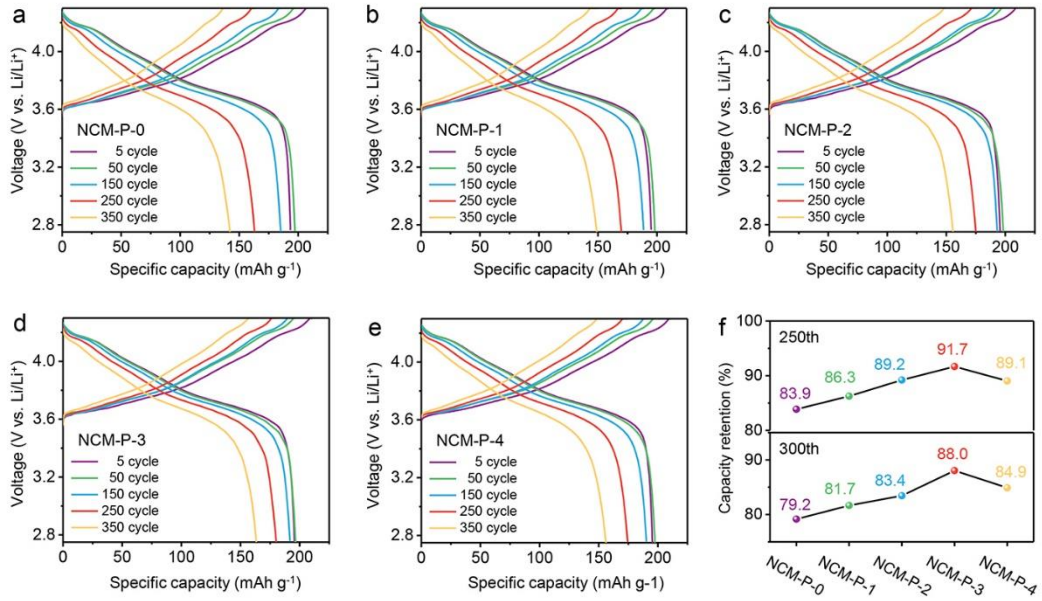

**Fig. S12.** (a-e) The charge/discharge voltage profile evolution of different cathodes at room temperature. (a) NCM-P-0; (b) NCM-P-1; (c) NCM-P-2; (d) NCM-P-3; (e) NCM-P-4. (f) The capacity retention of NCM-P-x after 250 and 300 cycles.

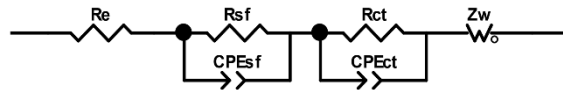

**Fig. S13.** The relevant equivalent circuit for the EIS measurement of NCM-P-x samples.

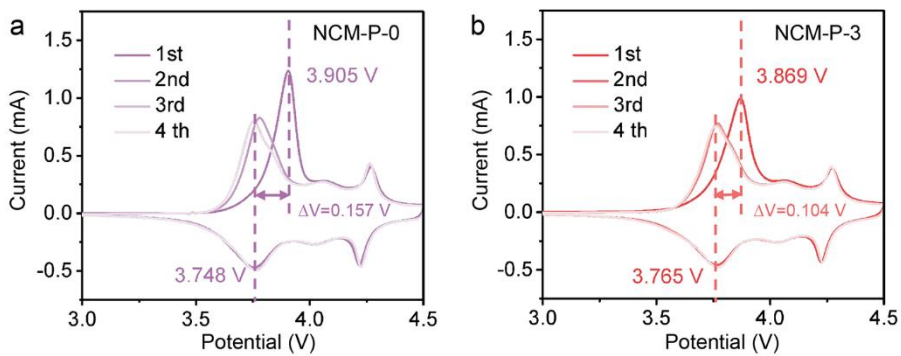

**Fig. S14.** Cyclic voltammetry curves of (a) NCM-P-0 and (b) NCM-P-3.

**Table S1.** The intensity ratios of (003)/(104), peak positions, d-spacings of the (003) plane, and lattice parameters of the cathode samples.

| Sample  | I(003)/I(104) | 2Theta(°) | a      | d(003) | c       |
|---------|---------------|-----------|--------|--------|---------|
| NCM-P-0 | 1.223         | 18.735    | 2.8764 | 4.7324 | 14.1972 |
| NCM-P-1 | 1.250         | 18.735    | 2.8764 | 4.7325 | 14.1975 |
| NCM-P-2 | 1.256         | 18.713    | 2.877  | 4.7389 | 14.2167 |
| NCM-P-3 | 1.258         | 18.709    | 2.8764 | 4.7391 | 14.2173 |
| NCM-P-4 | 1.271         | 18.696    | 2.877  | 4.7423 | 14.2269 |

**Table S2.** The corresponding binding energy positions and area proportion/relative contents for each element from the XPS results.

| XPS signals                                                 | Bonding energy position (eV) | Area proportion/Relative contents  |         |         |         |         |
|-------------------------------------------------------------|------------------------------|------------------------------------|---------|---------|---------|---------|
|                                                             |                              | NCM-P-0                            | NCM-P-1 | NCM-P-2 | NCM-P-3 | NCM-P-4 |
| C 1s – hydrocarbon contaminants (C-H)                       | 284.8                        | 72.4%                              | 77.1%   | 78.7%   | 80.3%   | 80.5%   |
| C 1s – carbonate compounds (CO <sub>3</sub> <sup>2-</sup> ) | 289.7                        | 27.6%                              | 22.9%   | 21.3%   | 19.7%   | 19.5%   |
| P 2p – phosphate ions (PO <sub>4</sub> <sup>3-</sup> )      | 133.4                        | 0                                  | 2.13%   | 2.25%   | 2.5%    | 3.01%   |
| Ni 2p – Ni 2p <sub>3/2</sub>                                | 855.3                        | Shifted values of bonding energies |         |         |         |         |
|                                                             |                              | 0                                  | -0.23   | -0.34   | -0.46   | -0.49   |



**Table S3.** The corresponding binding energy positions and area proportion/relative contents for each element from the XPS depth analysis.

| XPS signals                                            | Bonding energy position (eV) | Area proportion/Relative contents in the XPS depth analysis |       |       |       |       |
|--------------------------------------------------------|------------------------------|-------------------------------------------------------------|-------|-------|-------|-------|
|                                                        |                              | 0 s                                                         | 20 s  | 40 s  | 100 s | 400 s |
| P 2p – phosphate ions (PO <sub>4</sub> <sup>3-</sup> ) | 133.4                        | 2.50%                                                       | 2.39% | 1.88% | 0.89% | 0.47% |
| P 2p – P-M bonds (M= Ni, Co, Mn)                       | ~130                         | 0                                                           | 0     | 0     | 0.02% | 0.09% |
| O 1s – lattice oxygen                                  | 529.2                        | 95.2%                                                       | 76.4% | 62.3% | 40.9% | 32.7% |
| O 1s – surface impurities                              | 531.9                        | 4.8%                                                        | 23.6% | 37.7% | 59.1% | 67.3% |

**Table S4.** The detailed cycling performance data of NCM-P-x electrodes.

| Sample  | Specific discharge capacity at 0.5 C (mAh g <sup>-1</sup> ) | Specific discharge capacity of the 350th cycles (mAh g <sup>-1</sup> ) | The capacity retention of the 350th cycles (%) |
|---------|-------------------------------------------------------------|------------------------------------------------------------------------|------------------------------------------------|
| NCM-P-0 | 193.4                                                       | 139.9                                                                  | 72.3                                           |
| NCM-P-1 | 195.1                                                       | 148.6                                                                  | 76.2                                           |
| NCM-P-2 | 195.6                                                       | 154.5                                                                  | 79.0                                           |
| NCM-P-3 | 195.7                                                       | 162.6                                                                  | 83.1                                           |
| NCM-P-4 | 195.4                                                       | 155.1                                                                  | 79.4                                           |

**Table S5.** Comparison of the cathode materials involved in  $\text{Li}_3\text{PO}_4$  coatings.

| <b>Materials</b>                                                                  | <b>Methods of the introduction of <math>\text{Li}_3\text{PO}_4</math></b> | <b>Capacity retention (%)</b>   | <b>References</b>                                 |
|-----------------------------------------------------------------------------------|---------------------------------------------------------------------------|---------------------------------|---------------------------------------------------|
| <b>NCM-P-3</b>                                                                    | In-situ gas-solid reaction                                                | 95.1% after 200 cycles at 0.5C  | This work                                         |
| <b>LPO-infused</b>                                                                | ALD coating + annealing                                                   | 91.6% after 200 cycles at C/3   | Nat. Energy 3 (2018) 600–605.                     |
| <b><math>\text{Li}_3\text{PO}_4</math>-<br/><math>\text{LiYO}_2</math>@NCM811</b> | Solid mixing + annealing                                                  | 96.4% after 100 cycles at 1C    | J. Alloys Compd. 894 (2021) 162155.               |
| <b>PPy-LP@NCM811</b>                                                              | Wet coating + annealing                                                   | 86.5% after 200 cycles at 1C    | ACS Appl. Mater. Interfaces 9 (2017) 29732–29743. |
| <b>LP@NCM811</b>                                                                  | Wet coating + annealing                                                   | 75.7% after 200 cycles at 1C    |                                                   |
| <b><math>\text{Li}_3\text{PO}_4</math>@NCM622</b>                                 | citric acid assisted sol-gel method                                       | 79.7% after 100 cycles at 1C    | J. Power Sources 360 (2017) 206–214.              |
| <b><math>\text{Li}_3\text{PO}_4</math>-<br/><math>\text{TiO}_2</math>@LNMO</b>    | ALD coating                                                               | 89.3% after 100 cycles at 0.5C  | Nano Energy, 65 (2019) 103988.                    |
| <b><math>\text{Li}_3\text{PO}_4</math> @LNMO</b>                                  | ALD coating                                                               | 78.4% after 100 cycles at 0.5C  |                                                   |
| <b><math>\text{Li}_3\text{PO}_4</math> @NCM811</b>                                | Solid mixing + annealing                                                  | 84.6% after 200 cycles at 0.5C  | ACS Appl. Energy Mater. 3 (2020) 7445–7455.       |
| <b><math>\text{Li}_3\text{PO}_4</math> @NCM811</b>                                | Wet absorption + annealing                                                | 89.6% after 250 cycles at 1.0 C | Electrochim. Acta 340 (2020) 135871.              |
| <b><math>\text{Li}_3\text{PO}_4</math> @NCM811</b>                                | Wet mixing + annealing                                                    | 94.3% after 100 cycles at 0.2C  | ACS Appl. Energy Mater. 4 (2021) 2257–2265.       |

**Table S6.** Electrochemical impedance fitting results of NCM-P-x electrodes after 4 cycles.

| <b>Sample</b>  | <b>R<sub>sf</sub></b> | <b>R<sub>ct</sub></b> |
|----------------|-----------------------|-----------------------|
| <b>NCM-P-0</b> | 4.675                 | 27.84                 |
| <b>NCM-P-1</b> | 3.544                 | 25.17                 |
| <b>NCM-P-2</b> | 3.243                 | 23.24                 |
| <b>NCM-P-3</b> | 2.301                 | 20.04                 |
| <b>NCM-P-4</b> | 2.031                 | 18.96                 |
